# Supplementary material for: Chloroplastic thioredoxin-f and thioredoxin-m1/4 play important roles in brassinosteroids-induced changes in CO2 assimilation and cellular redox homeostasis in tomato
Source: PubMed Central journal article supplement (PMC4112637; doi:10.1093/jxb/eru207), 2014-05-20

**Supplemental Table S1.** PCR primers designed for vector construction.

| Vector                 | Forward primer                                 | Reverse primer                                  |
|------------------------|------------------------------------------------|-------------------------------------------------|
| pTRV2- <i>TRX-f</i>    | 5'-CGGCG <u>CTCGAG</u> ATATTTCTTCTTTTTTTT- 3'  | 5'-GGCGC <u>GAGCTC</u> AAGAATATGAGAATTTAGCT- 3' |
| pTRV2- <i>TRX-m2</i>   | 5'-CGGCG <u>CTCGAG</u> TACAATGGTGCGCGCATA- 3'  | 5'-GGCGC <u>GAGCTC</u> TAGTAGAATATTACTTCA- 3'   |
| pTRV2- <i>TRX-m1/4</i> | 5'-CGGCG <u>CTCGAG</u> CCTGGTGTTAATGATCAAT- 3' | 5'-GGCGC <u>GAGCTC</u> TTACAAGAATTTTTCTAT- 3'   |
| pTRV2- <i>TRX-x</i>    | 5'-CGGCG <u>CTCGAG</u> TATTCAGGGAAAAGTTCA- 3'  | 5'-GGCGC <u>GAGCTC</u> TGCATAAATACGATCATC- 3'   |
| pTRV2- <i>TRX-y</i>    | 5'-CGGCG <u>CTCGAG</u> TCTTAGCGTGCTGCCTTT- 3'  | 5'-GGCGC <u>GAGCTC</u> TACATTGAACATCAGTTG- 3'   |

**Supplemental Table S2.** Gene-specific primers designed for quantitative real-time RT-PCR.

| Gene            | Accession numbers | Forward primer                | Reverse primer                  |
|-----------------|-------------------|-------------------------------|---------------------------------|
| <i>actin</i>    | S111g005330       | 5'-TGTCCTATTACGAGGGTTATGC- 3' | 5'-CAGTTAAATCACGACCAGCAAGAT- 3' |
| <i>RCA</i>      | S110g086580       | 5'-CTGTTGGTCATCCGATGTGT- 3'   | 5'-CCCAAGGTTTCAAACAGGAA- 3'     |
| <i>rbcL</i>     | S101g007330       | 5'-ACCGCAAATACTACCTTGGC- 3'   | 5'-CCACCAGACATACGTAACGC- 3'     |
| <i>rbcS</i>     | S102g063150       | 5'-TTGCTTGAATTCGAGACTG- 3'    | 5'-CTCTTGAACCTCAGCCAACA- 3'     |
| <i>FBPase</i>   | S102g062340       | 5'-GAAGAGAAATGGCATCAGCA- 3'   | 5'-AGTGAGTCCAGAAGGATGGG- 3'     |
| <i>SBPase</i>   | S105g052600       | 5'-AGTTGGTGCTGCTGTTTGAG- 3'   | 5'-TTCGCGATGCTCTAGAAAGA- 3'     |
| <i>PGK</i>      | S107g066610       | 5'-GAAGGGCAAGAAAGTCTTCG- 3'   | 5'-AGTGTTTGATGGTAGGGATGG- 3'    |
| <i>PRK</i>      | S108g076220       | 5'-GGGATATGGCTGAAAGAGGA- 3'   | 5'-CTGAGTTGGGAGCACTTCAA- 3'     |
| <i>GAPDH</i>    | S103g111010       | 5'-GATTGGAGAGGTGGAAGAGC- 3'   | 5'-ACCACGGACACATCAACAGT- 3'     |
| <i>TRX-f</i>    | S105g056300       | 5'-CACAGTGGTGTGGTCCTTGT- 3'   | 5'-TTTGCTAGTGGCCTGTTGTC- 3'     |
| <i>TRX-m2</i>   | S110g006970       | 5'-GTCGATCCTCGGCAGTTAAT- 3'   | 5'-TTTCCTGAGCTTCACAGACG- 3'     |
| <i>TRX-m1/4</i> | S112g013810       | 5'-CCGTCGTTGTCTCCTGTTT- 3'    | 5'-GCCTCACAGACGATTCTTCC- 3'     |
| <i>TRX-x</i>    | S101g008250       | 5'-CCGTTGCTGAGGAGTACAAA- 3'   | 5'-TCTGGGACTTCCTTCCATC- 3'      |
| <i>TRX-y</i>    | S104g071560       | 5'-CGTCTTGTTCTCCTGTTGA- 3'    | 5'-TAGGAACCATGAACTGGCAA- 3'     |

**Supplemental Figure S1.** Relative mRNA abundance of *TRX-f*, *TRX-m2*, *TRX-m1/4*, *TRX-x* and *TRX-y* in respective virus-induced gene silencing (VIGS) plants. Data are the means of the 5<sup>th</sup> leaf of six silenced plants ( $\pm$ SD). Relative gene expression for each *TRX* gene was calculated as the pTRV plants (control)=1.

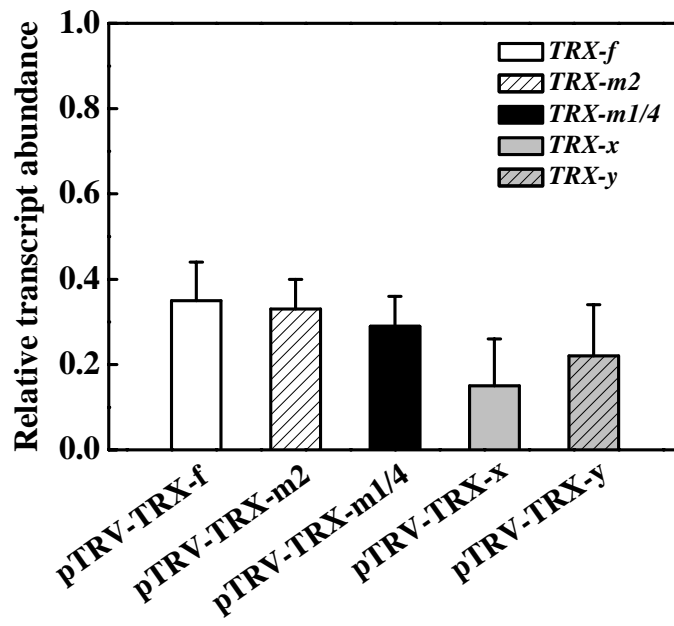

**Supplemental Figure S2.** Changes in maximum quantum yield of PSII ( $F_v/F_m$ ) in the leaves of pTRV and various partially *TRX*-silenced plants.  $F_v/F_m$  was measured with imaging PAM (IMAG-MAXI; Heinz Walz, Effeltrich, Germany) after whole plants were dark adapted for 30 min. Minimal fluorescence ( $F_o$ ) was measured during the weak measuring pulses and maximal fluorescence ( $F_m$ ) was measured by a 0.8-s pulse light at about  $4,000 \mu\text{mol m}^{-2} \text{s}^{-1}$ .  $(F_m - F_o)/F_m = F_v/F_m$ . Data are the means of four replicates with SDs. Means followed by the same letter are not significantly different according to Tukey's test ( $P < 0.05$ ).

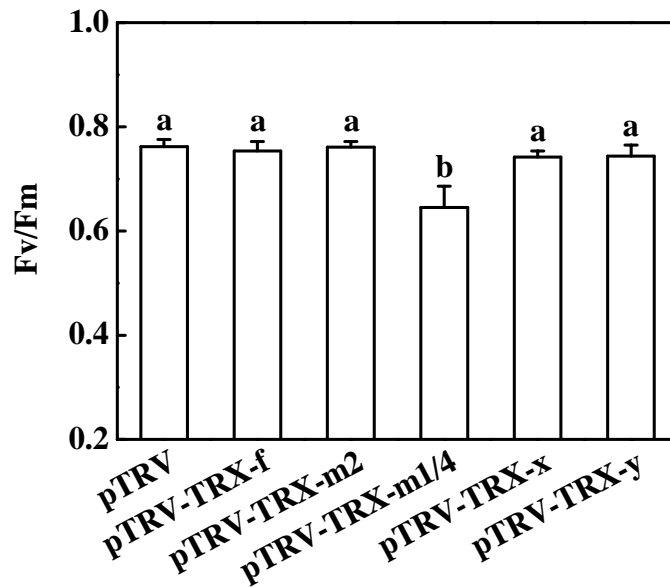

Supplement: supp_eru207_jexbot120048_file001.pdf [file supp_eru207_jexbot120048_file001.pdf]
